# Supplementary material for: Antepartum Aspirin Administration Reduces Activin A and Cardiac Global Longitudinal Strain in Preeclamptic Women
Source: PubMed Central journal article supplement — J Am Heart Assoc. 2020 Jun 4;9(12):e015997. doi: 10.1161/JAHA.119.015997 (PMC7429043; doi:10.1161/jaha.119.015997), 2020-06-04
Supplement: JAH3-9-e015997-s001.pdf [file JAH3-9-e015997-s001.pdf]

# **SUPPLEMENTAL MATERIAL**

**Table S1. Angiogenic Biomarkers Stratified by Diagnosis.**

|                                         | ASPRIN               | NO ASPIRIN           | P-Value |
|-----------------------------------------|----------------------|----------------------|---------|
| Patients with Preeclampsia              | N = 11               | N = 39               |         |
| Activin, ng/ml                          | 8.40 (5.84, 24.46)   | 24.95 (11.89, 36.49) | 0.01    |
| Follistatin, ng/ml                      | 16.15 (10.93, 21.10) | 13.29 (6.71, 18.27)  | 0.19    |
| FSTL3, ng/ml                            | 36.71 (26.60, 61.69) | 45.93 (37.51, 65.34) | 0.18    |
| Activin/Follistatin                     | 0.76 (0.31, 1.70)    | 1.89 (0.85, 3.63)    | 0.01    |
| Activin/FSTL3                           | 0.23 (0.22, 0.29)    | 0.49 (0.28, 0.66)    | 0.01    |
| Patients with Superimposed Preeclampsia | N = 14               | N = 28               |         |
| Activin, ng/ml                          | 6.10 (3.47, 9.93)    | 9.31 (6.30, 12.13)   | 0.06    |
| Follistatin, ng/ml                      | 9.06 (5.89, 14.25)   | 11.43 (8.79, 16.42)  | 0.34    |
| FSTL3, ng/ml                            | 34.48 (26.07, 50.02) | 38.56 (24.15, 47.98) | 0.96    |
| Activin/Follistatin                     | 0.53 (0.27, 0.73)    | 0.75 (0.39, 1.01)    | 0.19    |
| Activin/FSTL3                           | 0.15 (0.07, 0.27)    | 0.21 (0.16, 0.28)    | 0.07    |

Data is presented as median (quartile 1, quartile 3) or n (%) depending on variable type. These results are assessed between groups with a Wilcoxon Rank Sum or chi-square test, respectively. BP = blood pressure, ECHO = echocardiogram
